# Supplementary material for: Liver Transaminases in Pediatric Adenovirus Infection—A Five-Year Study in Two Major Reference Centers from Romania
Source: MDPI journal article supplement (doi:10.3390/microorganisms11020302), 2023-01-24
Supplement: s1 [file s1]

**Supplementary material**

**Normal ranges of transaminases**

National Institute for Infectious Diseases "Prof. Dr. Matei Balș", Bucharest, Romania

| Age          | AST normal range | ALT normal range |
|--------------|------------------|------------------|
| Under 1 year | 5 – 50 U/L       | 5 – 65 U/L       |
| Over 1 year  | 10 – 37 U/L      | 10 – 60 U/L      |

National Institute of Mother and Child Health "Alessandrescu-Rusescu", Bucharest, Romania

| Age          | AST normal range | ALT normal range |
|--------------|------------------|------------------|
| Under 1 year | 6 – 56 U/L       | 6 – 60 U/L       |
| Over 1 year  | 7 – 45 U/L       | 7 – 55 U/L       |
